# Supplementary material for: Mapping the role of digital health technologies in the case detection, management, and treatment outcomes of neglected tropical diseases: a scoping review
Source: Trop Med Health. 2021 Feb 22;49:17. doi: 10.1186/s41182-021-00307-1 (PMC7898439; doi:10.1186/s41182-021-00307-1)
Supplement: Supplementary file 2 — Additional file 2:. Extracted data. [file 41182_2021_307_MOESM2_ESM.xlsx]

## Sheet: extraction data shit
author	year	country	region	types _etechnologyuse	aim	purpose _application/aim	total _population,Study design	NTD_disease	main result	setting(r/u)	types of publication	method of data collection
Tambo et al	2018	reviews in Africa generally	Africa	mhealth,ehealth and electronic health records	disease management and treatment outcome	the use digital public health technology applications in understanding and data mapping models for health and environment decisions, support in improving health service access and uptake in Africa at the community health system	expert review	leishmaniasis	able to improve the service delivery and outcomes, monitoring VL disease	not specific	review
Bhunia et al	2012	india	Asia	telehelth	telehealth (environmental control measure(tele-education&tele training),treatment and diagnosis(contact with health professionals and tele-consultation)).Vector control strategy, perspectives on diagnosis, treatment, and control of visceral leishmaniasis	for diagnosis and treatment=to provide a good opportunity for the patients to have access to remote hospitals for real time evaluation by specialists, via either video or audio, using Doppler’s and webcams.to integrate multifaceted intervention, prevention, assessment, and treatment to achieve improved personnel as well as local, national, and international community health	expert review	leishmaniasis	improved medical care to remote rural areas; including many other activities like public awareness, changing personal behavior, early diagnosis and complete treatment, integrated vector management and vector surveillance; social mobilization and building partnerships	not specific	review	searching literature on telehealth using several bibliographic databases.
Madon et al	2014	Tanzania	africa	Mobil phone(SMS)	control of NTDs(quantifing drug need,prioritizing disease at local level,upward information and facilitating decission	to test the feasibility of a mobile phone-based Management Information System (MIS)using frontline health workers to capture data at point of source for controle of NTDs	qualitative	For all NTDs	increase the efficiency of routine work boosting the motivation and self-esteem of village health workesr;increased the flow of communication with district-level health official; increase the overall success of the NTD control programme in the country	both	research article
Vroom et al	2017	Ghana	africa	mhealth	disase management	To assess data quality to determine if this mode of reporting is viable/feasible for the programme	2 years follow up	lymphatic filariasis	The use of mobile phones does not guarantee improved data accuracy. However, the type of mobile technology used may aid in improving data completeness.	rural	thesis
Mwingira et al	2017	tanzania	africa	mhealth	case detection	lyphatic filariasis patient identification	cross sectional	lymphatic filariasis	The approach is a feasible framework that could be used in other large urban environments in the LF endemic areas	Urban	research article
Stanton et al	2015	Malawi&Ghana	africa	mobile message(SMS)	case management/disease management	to develop and test an SMS tool (MeasureSMS) which enables trained community-based health workers to report basic information on all cases they identified (case management/disease management)	case study	lymphatic filariasis	enable national programmes to more effectively monitor their community impact in an efficient, timely and cost-effective way,despite there were minor issues such as the quality of their personal mobile phone, occasional poor network coverage had little effect on the quality of the data received	rural	research article
